# Supplementary material for: Two reversible ferroelectric phase transitions in diisopropylammonium perchlorate
Source: Royal Society of Chemistry journal article supplement (doi:10.1039/c5ra09971d), 2015-01-01
Supplement: c5ra09971d1.pdf [file c5ra09971d1.pdf]

## Electronic Supplementary Information

### Two reversible ferroelectric phase transitions in Diisopropylammonium Perchlorate

Kaige Gao<sup>a</sup>, Zepeng Cui<sup>a</sup>, Chuang Liu<sup>a</sup>, Jiansheng Zhu<sup>a</sup>, Hong-Ling Cai<sup>a\*</sup>, Xiaoshan Wu<sup>a\*</sup>

**Table S1 Crystal data and structure refinement of DIPAP at 263K, 293K, 343K.**

|                          | LTP                | ITP       | HTP                |
|--------------------------|--------------------|-----------|--------------------|
| Temperature              | 263K               | 293K      | 343K               |
| Crystal system           | Monoclinic         | Triclinic | Monoclinic         |
| Space group              | P2 <sub>1</sub> /c | P1        | P2 <sub>1</sub> /c |
| a/Å                      | 17.70              | 8.15      | 17.74              |
| b/Å                      | 8.25               | 8.52      | 8.72               |
| c/Å                      | 16.06              | 8.77      | 16.60              |
| $\alpha$ /deg            | 90                 | 82.71     | 90                 |
| $\beta$ /deg             | 116.33             | 65.14     | 118.39             |
| $\gamma$ /deg            | 90                 | 79.90     | 90                 |
| Volume (Å <sup>3</sup> ) | 2102               | 543       | 2260               |
| Z                        | 8                  | 2         | 8                  |

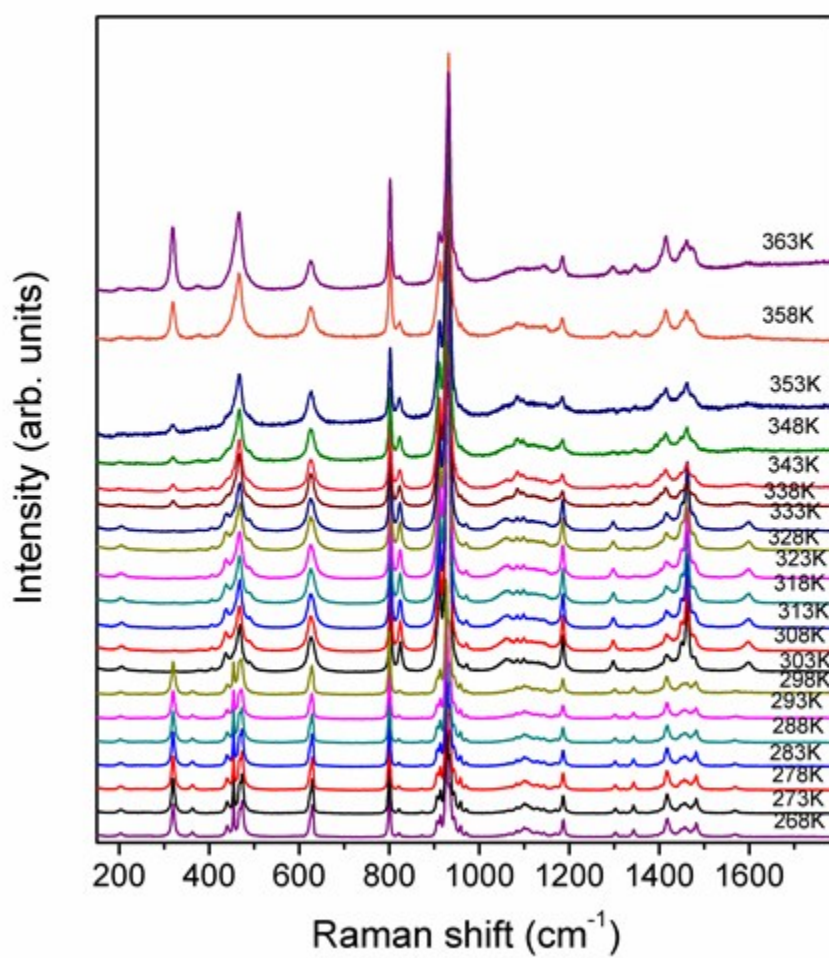

**Fig. S1 Raman spectrum of DIPAP measured at different temperature.**

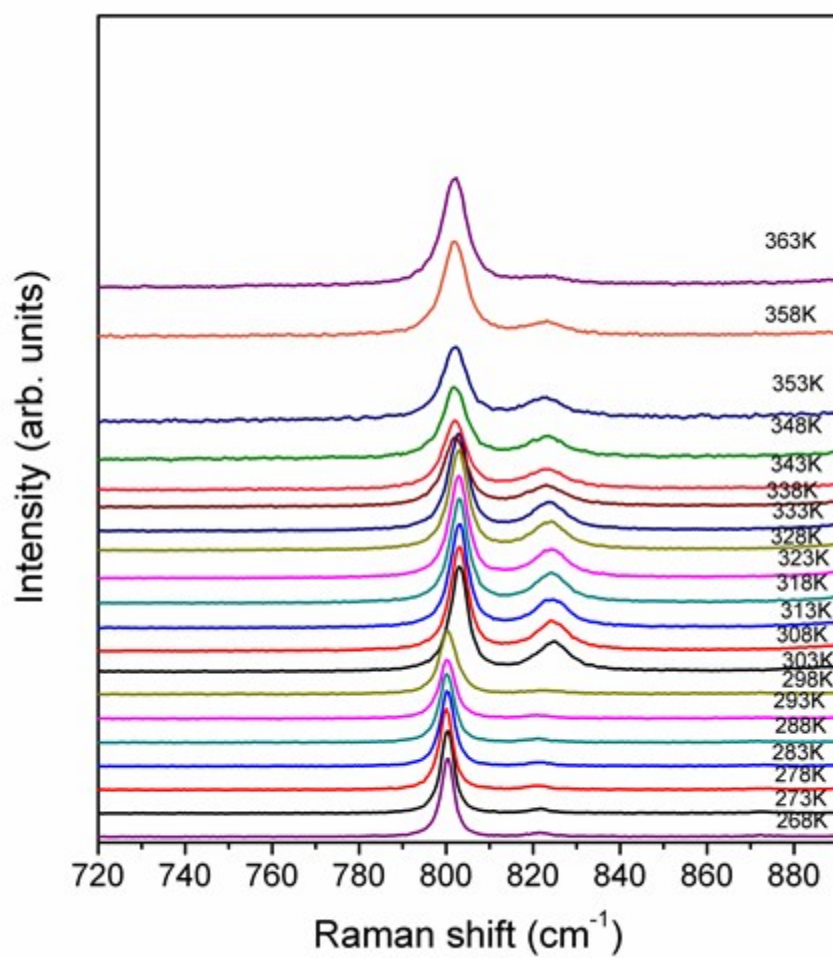

**Fig. S2 Raman spectrum of DIPAP measured at different temperature.**

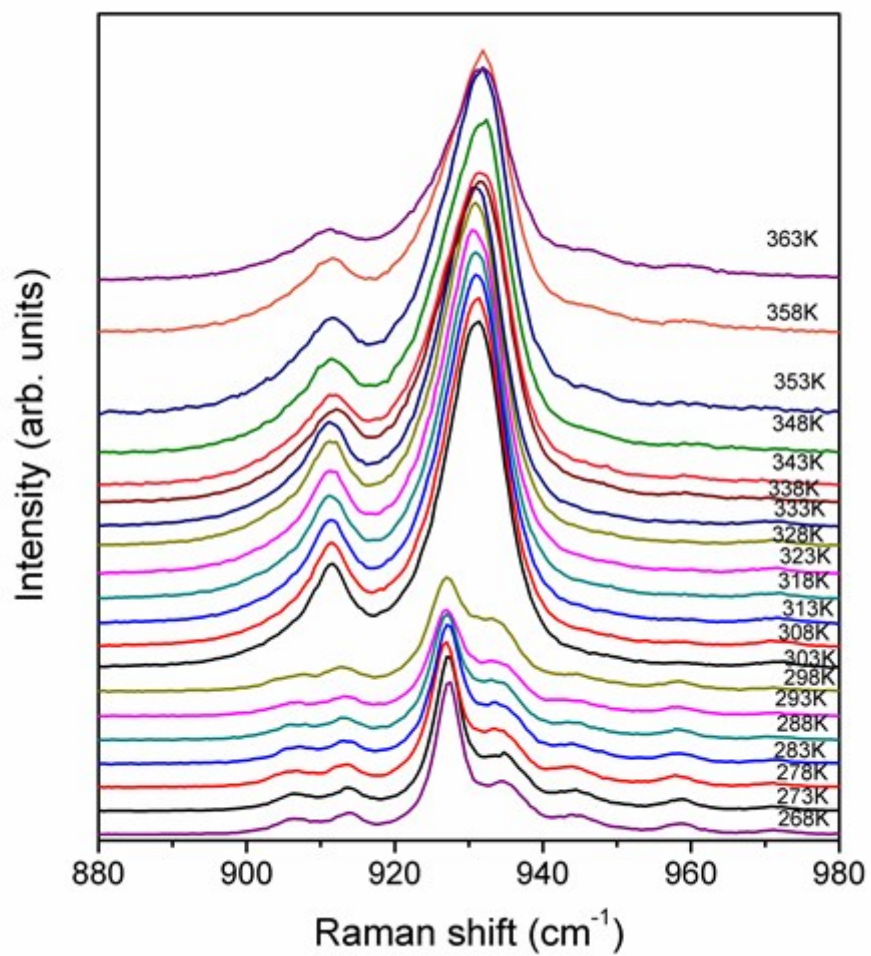

**Fig. S3 Raman spectrum of DIPAP measured at different temperature.**

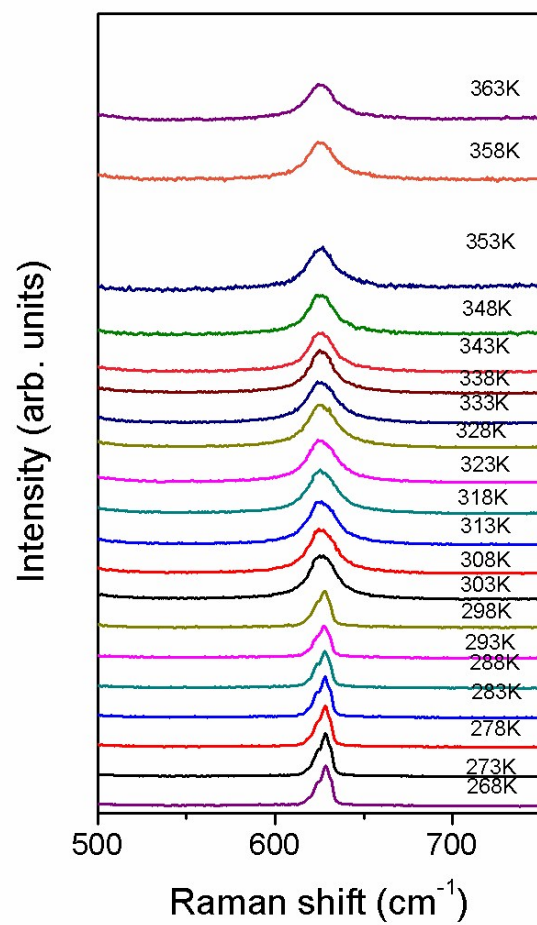

**Fig. S4 Raman spectrum of DIPAP measured at different temperature.**
